# Supplementary material for: 3D interconnected N-doped graphene architecture encapsulated with oxygen-deficient TiO2 nanotube array: synergism of oxygen vacancy and carbon materials on enhanced sulfur conversion and catalytic activity of TiO2 nanotube array in Li–S batteries
Source: Royal Society of Chemistry journal article supplement (doi:10.1039/d3me00163f), 2023-11-23
Supplement: d3me00163f1.pdf [file d3me00163f1.pdf]

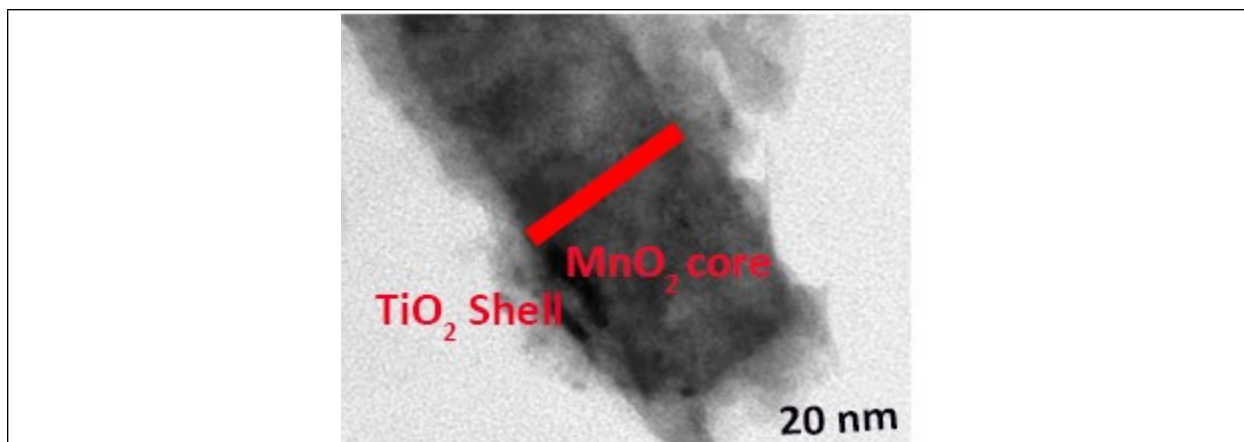

Fig. S1 SEM image of TiO<sub>2</sub> nanowire at MnO<sub>2</sub>

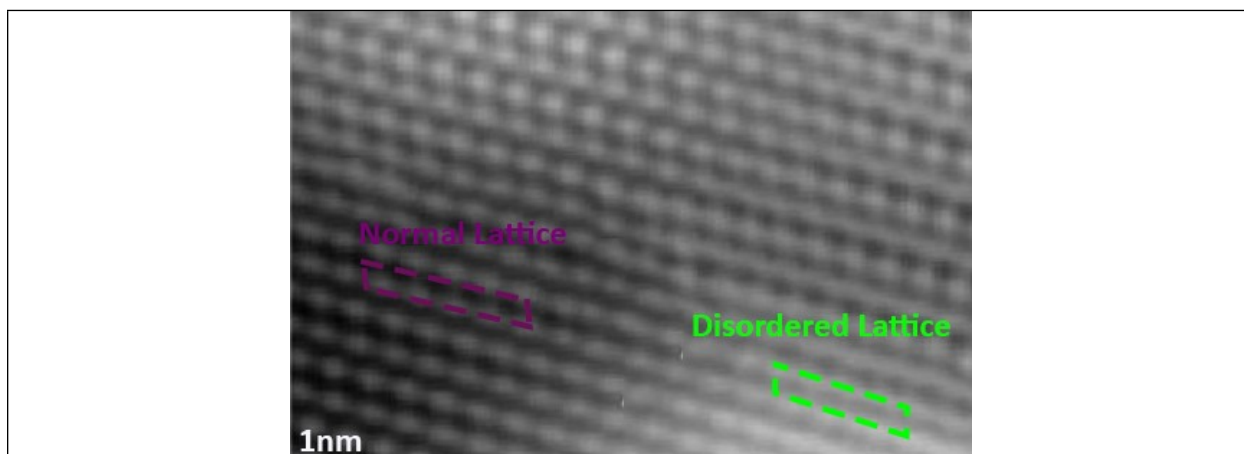

Fig. S2 inverse fast Fourier transform plot of OVTNW

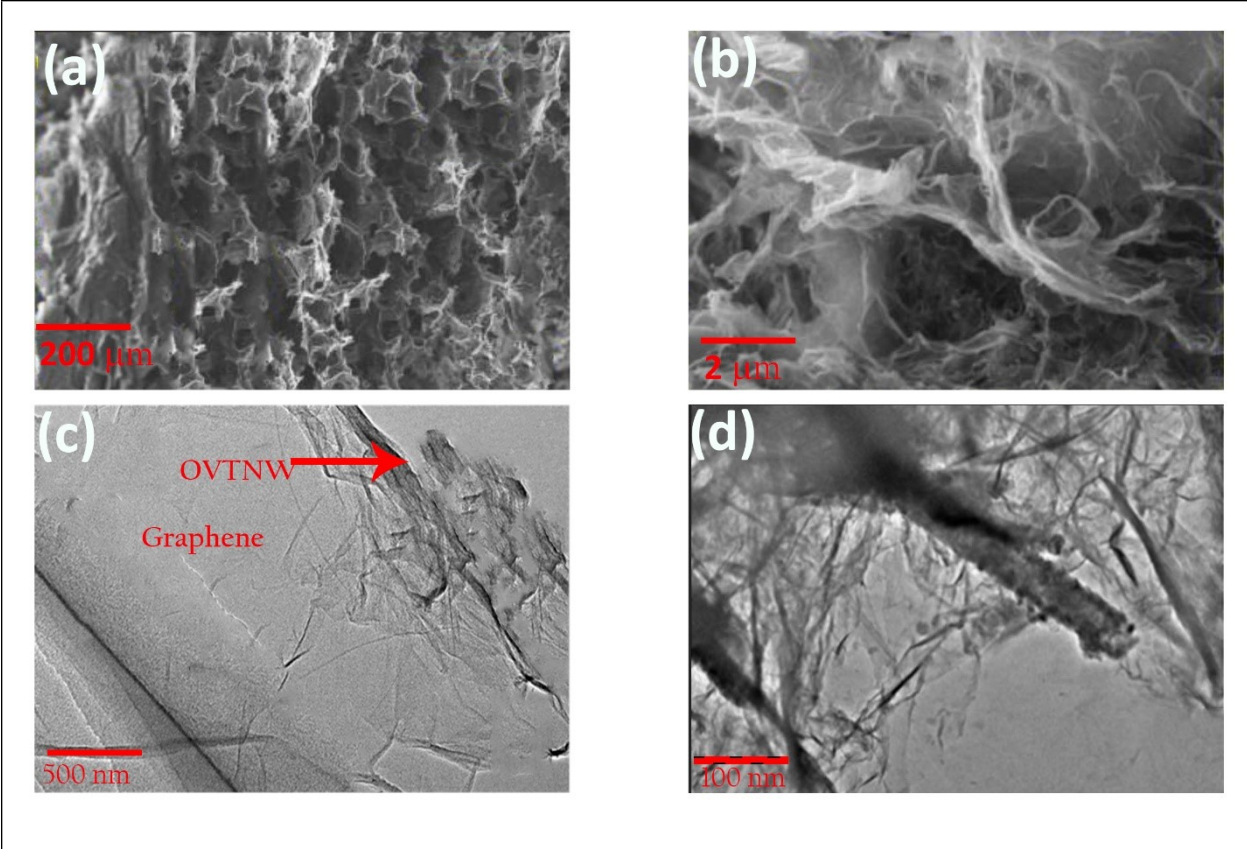

Fig.S3 (a) , (b) SEM images of OVTNW/NGA (c), (d) TEM images of OVTNW/NGA

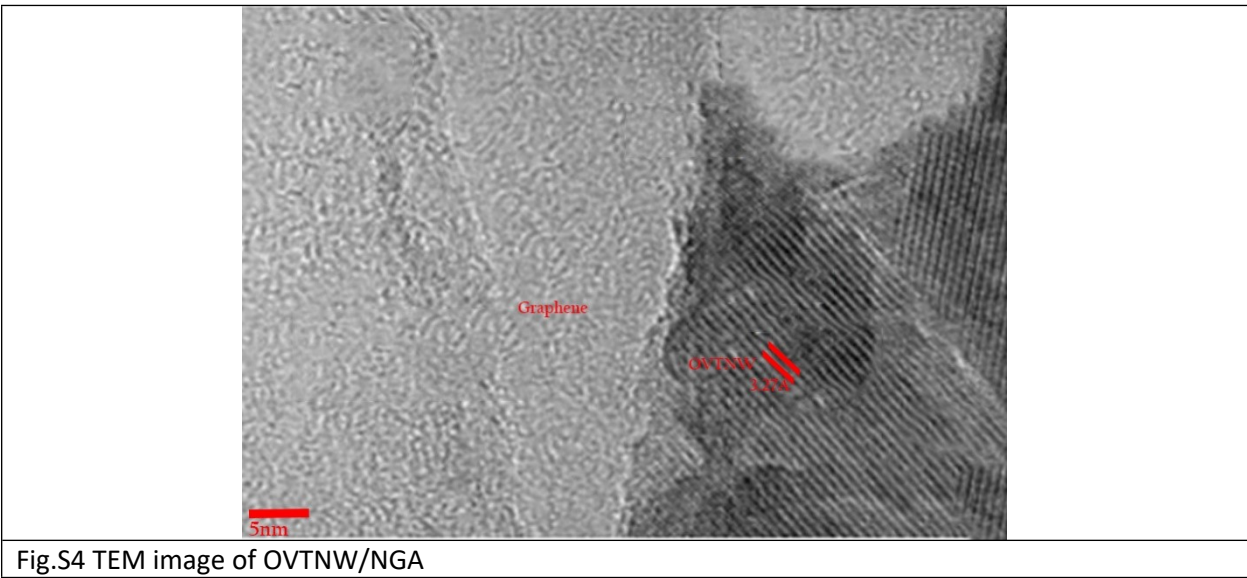

Fig.S4 TEM image of OVTNW/NGA

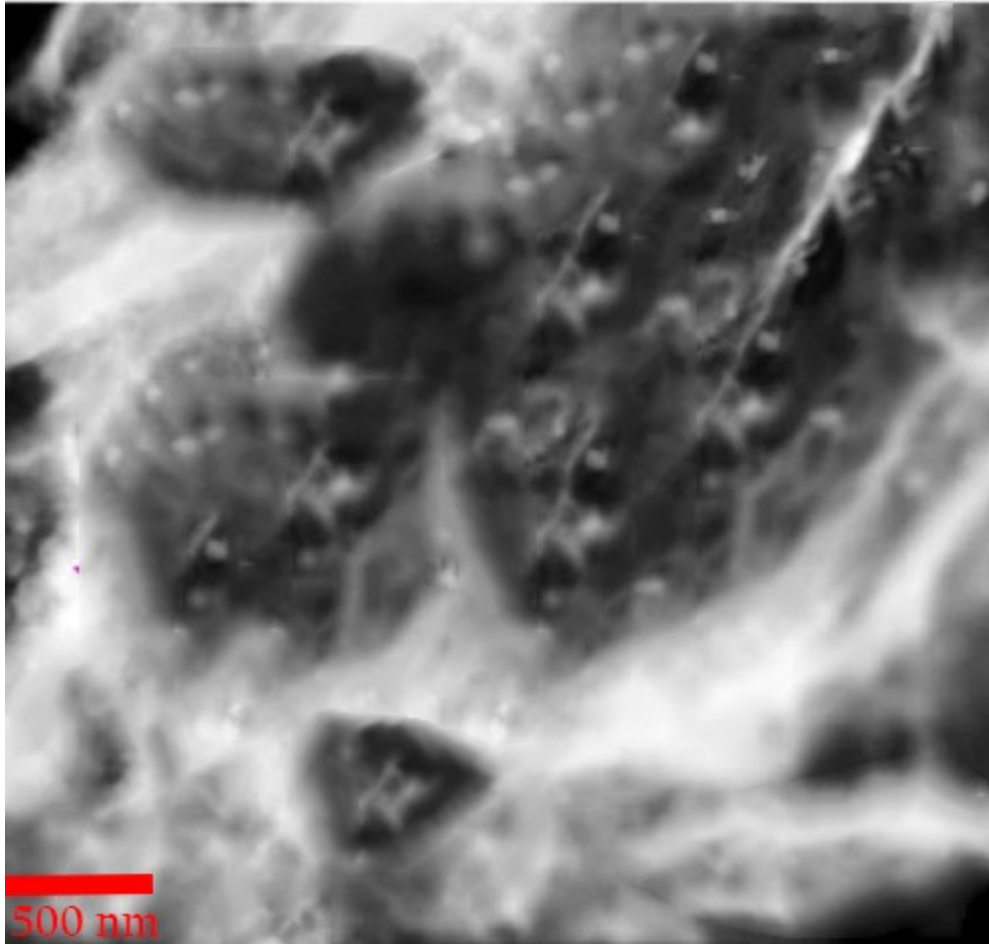

Fig.S5 SEM image of S- OVTNW/NGA

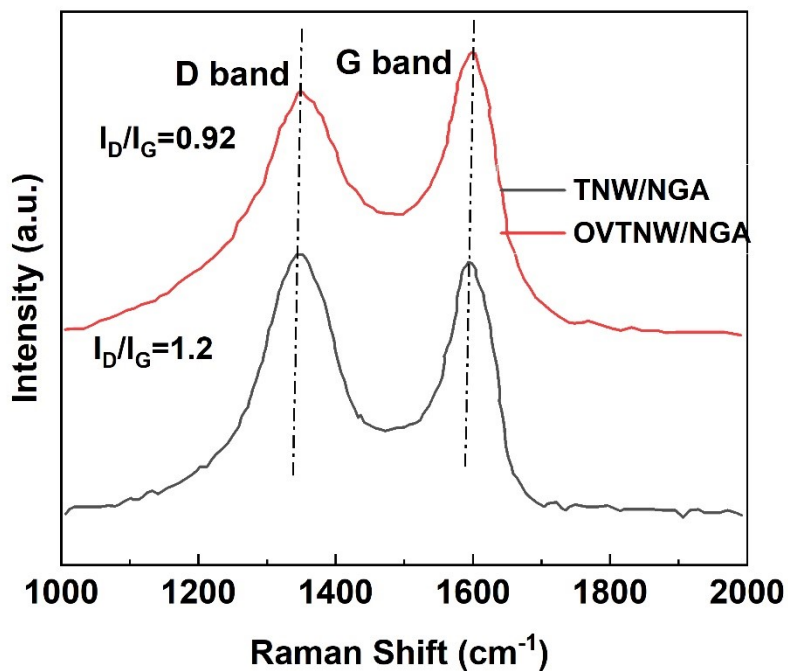

Fig. S6 Raman spectrum of OVTNW/NGA and TNW/NGA

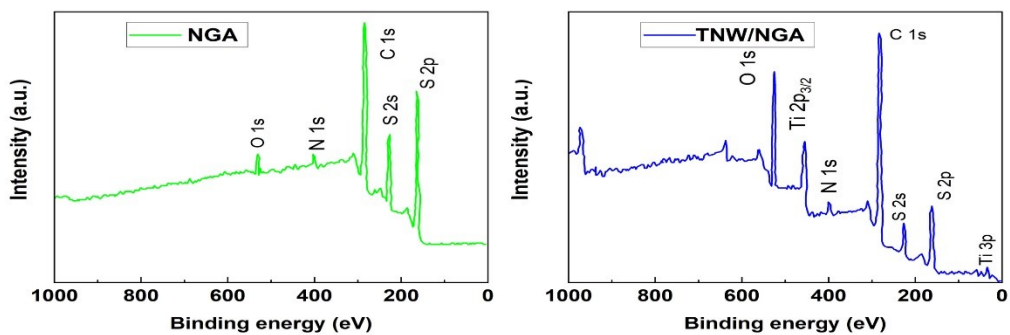

Fig. S7 XPS full-scan spectrum of NGA and TNW/NGA

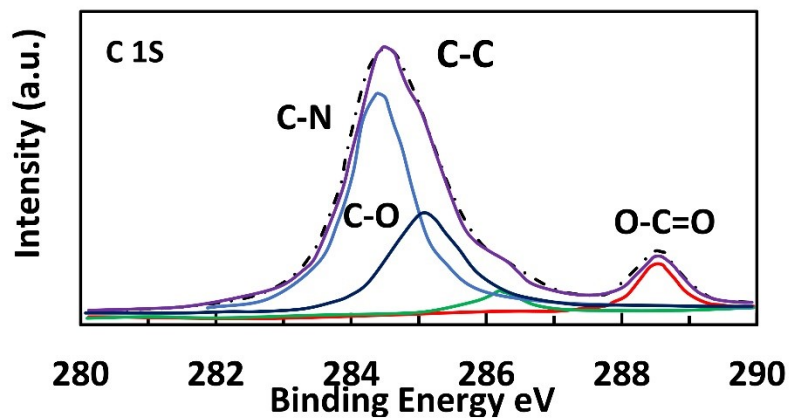

Fig. S8. deconvoluted XPS spectra of C 1s for OVTNW/NGA

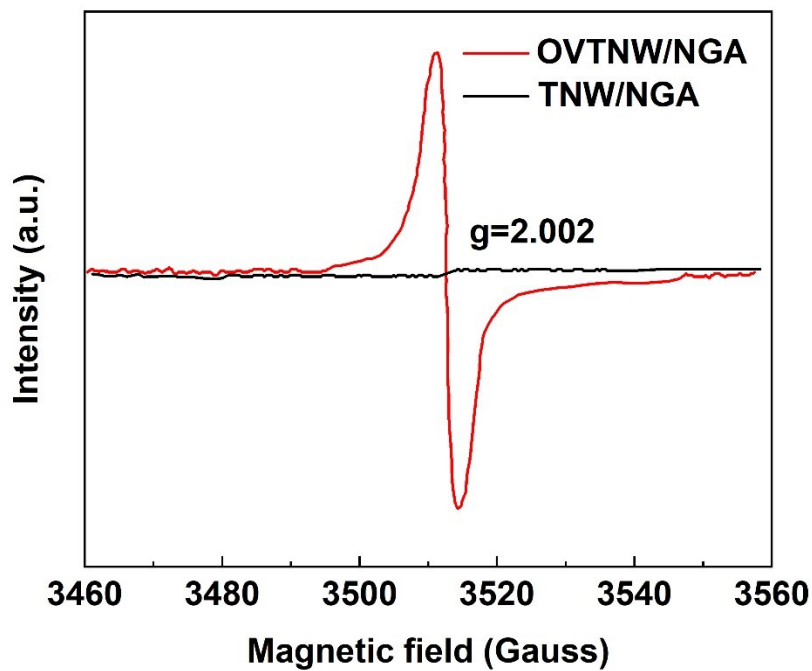

Fig. S9 EPR spectroscopy of OVTNW/NGA and OVTNW/NGA

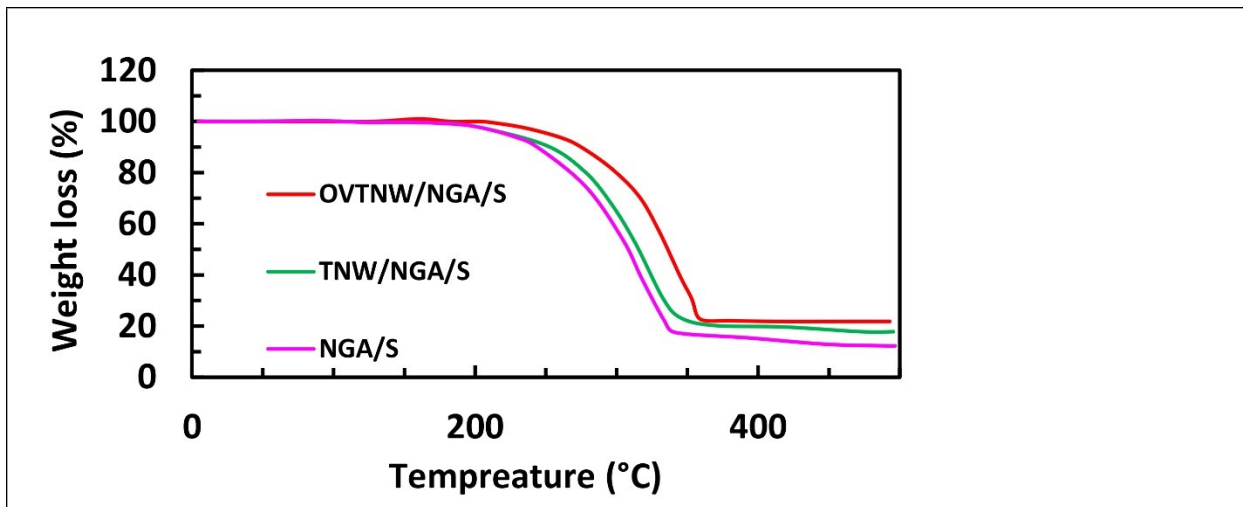

Fig. S10 TG curves of OVTNW/NGA/S, TNW/NGA/S and NGA under nitrogen.

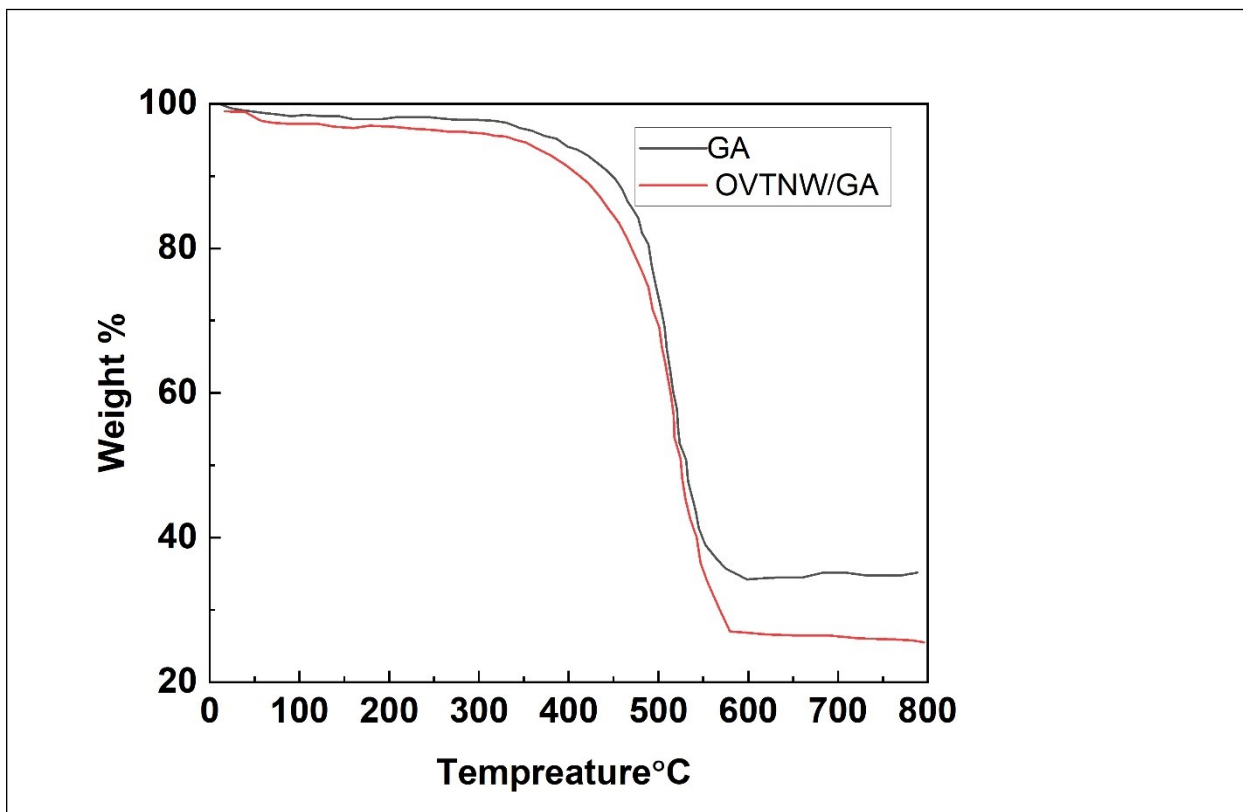

Fig. S11 TGA curves of  $\text{TiO}_2@\text{NC}$  and  $\text{OVs-TiO}_2\text{-x}@\text{NC}$  in air atmosphere.

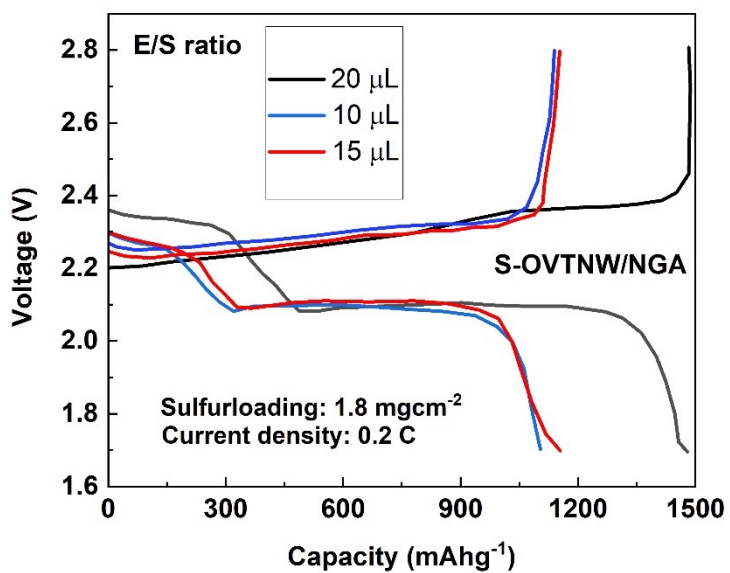

Fig. S12 The galvanostatic charge-discharge profiles of S-OVTNW/NGA electrode with different E/S amounts at 0.2 C

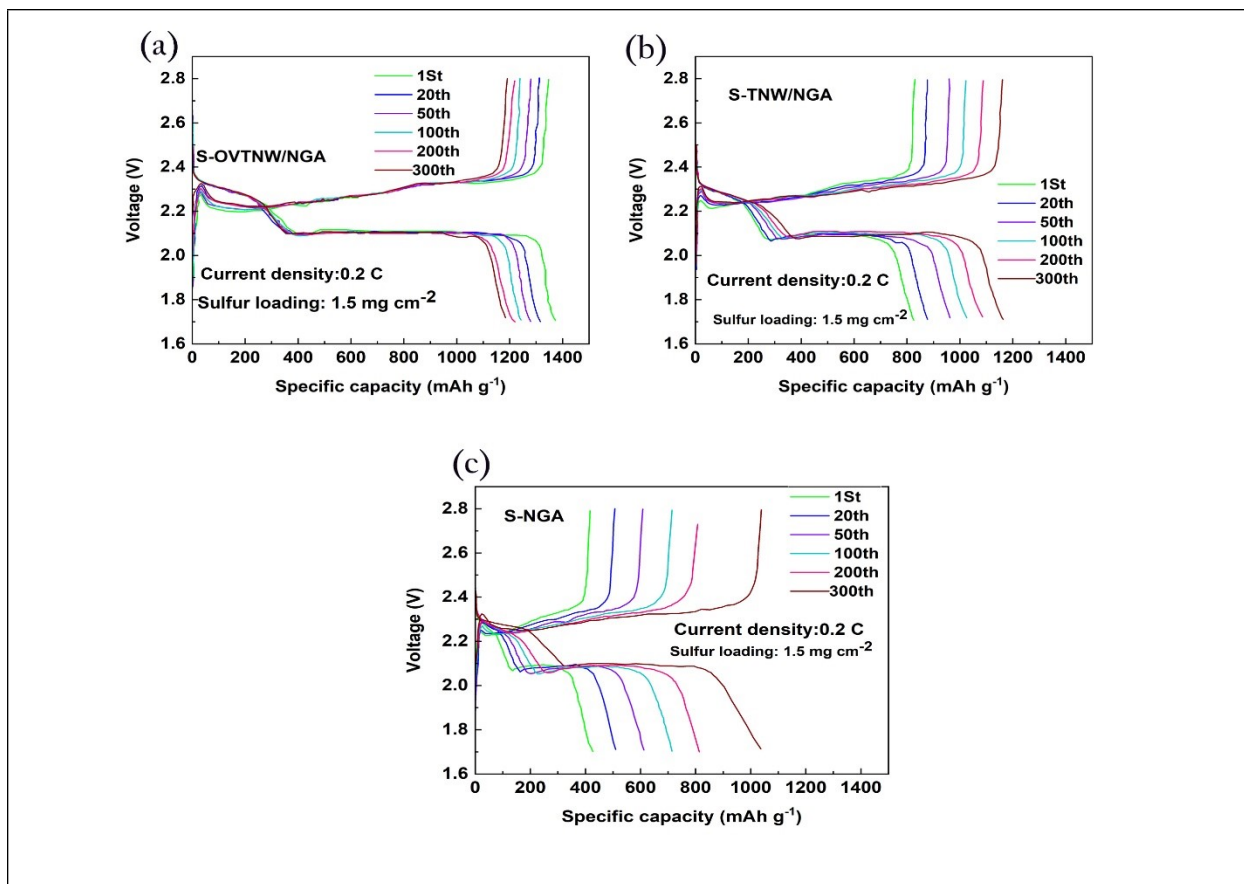

Fig.S13 The –charge-discharge plots for S-OVTNW/NGA at several cycle times (J=0.2 C)

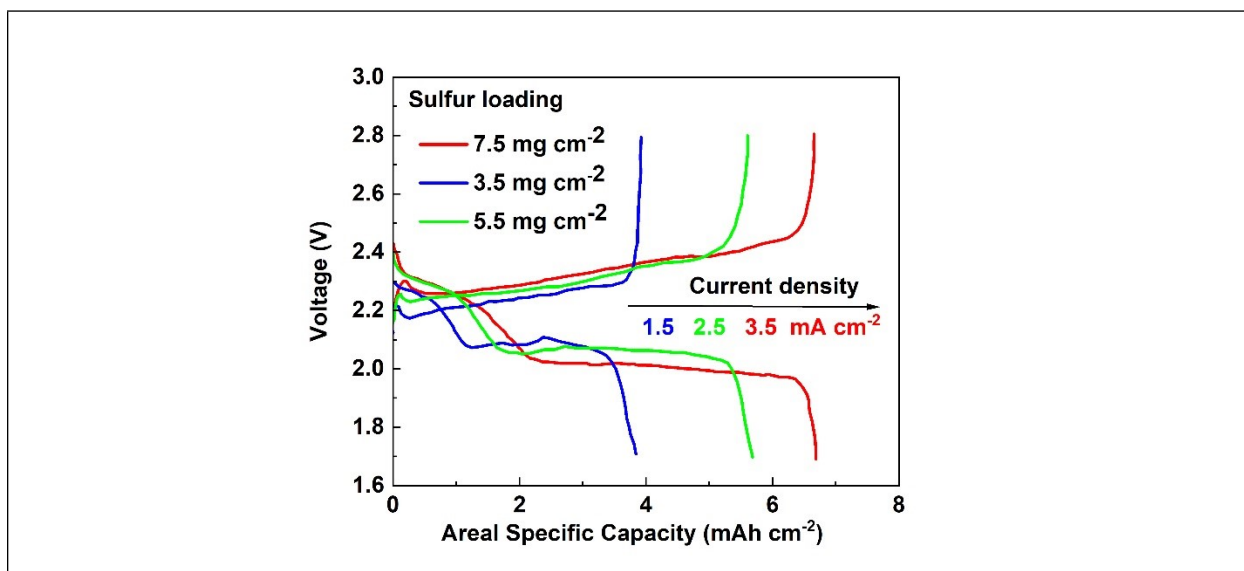

Fig.S14 The galvanostatic charge-discharge plots of the S-OVTNW/NGA cathode under several sulfur loading of 3.5, 5.5, and 7.5 mg cm<sup>-2</sup> at the current density of 0.2 C.



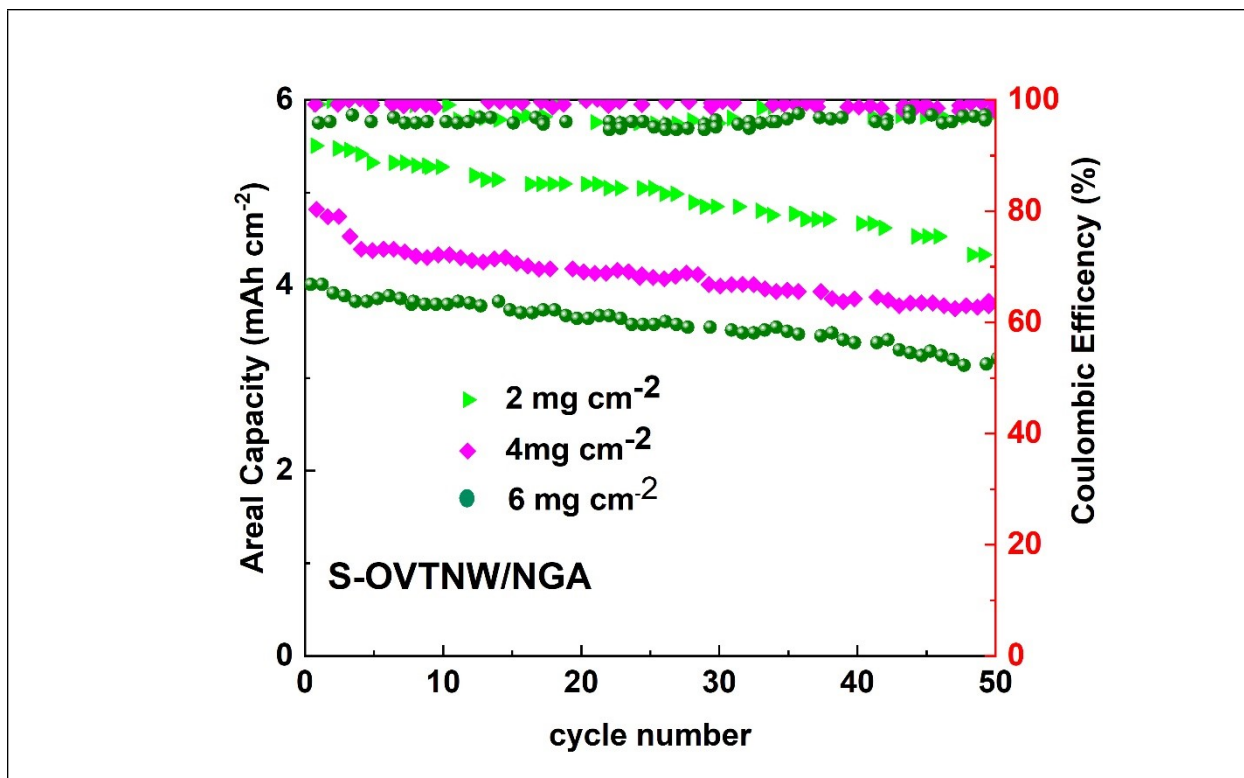

Fig.S15 Cycling analysis obtained at 0.1 C for Li-S cells fabricated using S-OVTNW/NGA at different sulfur loadings

| sample      | Peak I | Peak II | Peak III |
|-------------|--------|---------|----------|
| S-OVTNW/NGA | 0.63   | 0.45    | 0.71     |
| S-TNW/NGA   | 0.56   | 0.41    | 0.63     |
| S-NGA       | 0.54   | 0.40    | 0.57     |

| Electrodes                     | Sulfur Loading (mg cm <sup>-2</sup> ) | Current Density (mA cm <sup>-2</sup> ) | Initial capacity (mAh g <sup>-1</sup> ) | Reversible Capacity (mAh g <sup>-1</sup> ) | Decay Rate (per cycle%) | Cycle number | Ref       |
|--------------------------------|---------------------------------------|----------------------------------------|-----------------------------------------|--------------------------------------------|-------------------------|--------------|-----------|
| <b>S-OVTNW/NGA</b>             | 1.5                                   | 0.1                                    | 1370                                    | 900                                        | 0.15                    | 100          | This work |
| <b>TiO@G-S</b>                 | 1                                     | 2                                      | 831                                     | 455                                        | 0.226                   | 200          | [2]       |
| <b>TiO@C-HS/S</b>              | 1.5                                   | 0.2                                    | 1190                                    | 750                                        | 0.074                   | 500          | [3]       |
| <b>S@TiN-NP</b>                | 1.5                                   | 1                                      | 1163                                    | 1036                                       | 0.218                   | 50           | [4]       |
| <b>C@TiN-S</b>                 | 1.1                                   | 1                                      | -                                       | 741                                        | -                       | 150          | [5]       |
| <b>OVsTiO<sub>2x</sub>@C/S</b> | 1.6                                   | 1                                      | 1086                                    | 792                                        | 0.014                   | 2000         | [6]       |
